# Supplementary material for: A novel role for STOMATAL CARPENTER 1 in stomata patterning
Source: PubMed Central journal article supplement (PMC4970199; doi:10.1186/s12870-016-0851-z), 2016-08-02
Supplement: 12870_2016_851_MOESM5_ESM.pdf [file 12870_2016_851_MOESM5_ESM.pdf]

## Additional file 5: Primers used in this study.

| Purpose                | Primer name  | Sequence                                 | Reference |
|------------------------|--------------|------------------------------------------|-----------|
| SCAP1 promoter cloning | attB1-SCAP1  | AAAAGCAGGCTTCtctgtttttgttcatccaaag       |           |
|                        | attB2-SCAP1  | AGAAAGCTGGGTGgtaaagtaggagagagagagagaac   |           |
| amiRNA-SCAP1 cloning   | 1-I          | gaTATTAGGGATAAACGCGACCtctctctttgtattcc   |           |
|                        | 1-II         | gaGGGTGCGGTTTATCCCTAATAtcaaagagaatcaatga |           |
|                        | 1-III        | gaGGATCGCGTTTATGCCTAATTtcacaggtcgtgatatg |           |
|                        | 1-IV         | gaAATTAGGCATAAACGCGATCCtcatatataattct    |           |
|                        | 2-I          | gaTAATGATTAAGATCGGTCCGActctctttgtattcca  |           |
|                        | 2-II         | agTCGGACCGATCTTAATCATTAtcaaagagaatcaatga |           |
|                        | 2-III        | agTCAGACCGATCTTTATCATTTtcacaggtcgtgatatg |           |
|                        | 2-IV         | gaAAATGATAAAGATCGGTCTGActcatatataattccta |           |
|                        | A            | caccCTGCAAGGGATTAAGTTGGGTAAAC            |           |
|                        | B            | GCGGATAACAATTTACACAGGAAACAG              |           |
| SCAP1 CDS cloning      | SCAP1-Fw     | caccATGTCTCCCATACCAATCTCC                |           |
|                        | SCAP1-Re2    | AGGCAATGCATTATAATGATTAAG                 |           |
| Genotyping RT-PCR      | SCAP1-Re3    | TCAAGGCAATGCATTATAATGATTA                |           |
|                        | Ds3-1        | ACCCGACCGGATCGTATCGGT                    | [1]       |
|                        | SPCH-Fw      | AAAACAAATTCGTTTGCTCCC                    | [2]       |
|                        | SPCH-Re      | TATGAGGGACTCGCATTCATC                    |           |
|                        | LBb1.3       | ATTTTGCCGATTTCCGGAAC                     |           |
| qRT-PCR                | qRT-SCAP1-Fw | GCCGACGAAGAAAGGAGATA                     |           |
|                        | qRT-SCAP1-Re | TCCAAGCTTGAATTCATTG                      |           |
|                        | qRT-MYB60-Fw | CATGAAGATGGTGATCATGAGG                   | [3]       |
|                        | qRT-MYB60-Re | TTCCATTTGACCCCCAGTAG                     |           |
|                        | qRT-SPCH-Fw  | CGCTTCGCTCTTACAGCTCA                     | [4]       |
|                        | qRT-SPCH-Re  | CCGTTTTGAGCAGCACGTTA                     |           |
|                        | qRT-MUTE-Fw  | CAGACAATCGAGCCATCCAG                     |           |
|                        | qRT-MUTE-Re  | CCCACGATTCGCCTAGAGAC                     |           |
|                        | qRT-FAMA-Fw  | CTCCTACGTTCAAAGGGGAGAC                   | [5]       |
|                        | qRT-FAMA-Re  | CTTCGACGCTTCTGTGATTCAGAC                 |           |
|                        | qRT-EPF2-Fw  | TTTGGTGTAACTCCATTCG                      | [6]       |
|                        | qRT-EPF2-Re  | ATCCGGTAAGCTTGATCCTGT                    |           |
|                        | qRT-ACT-Fw   | GTGTTGGACTCTGGAGA TGGTGTG                |           |
|                        | qRT-ACT-Re   | GCCAAAGCAGTGATCTCTTTGCTC                 |           |

### Additional references

1. Galbiati M, Simoni L, Pavesi G, Cominelli E, Francia P, Vavasseur A, Nelson T, Bevan M, Tonelli C: **Gene trap lines identify Arabidopsis genes expressed in stomatal guard cells.** *Plant J* 2008, **53**:750–762.

2. MacAlister CA, Ohashi-Ito K, Bergmann DC: **Transcription factor control of asymmetric cell divisions that establish the stomatal lineage.** *Nature* 2007, **445**:537–540.

3. Cominelli E, Galbiati M, Albertini A, Fornara F, Conti L, Coupland G, Tonelli C: **DOF-binding sites additively contribute to guard cell-specificity of AtMYB60 promoter.** *BMC Plant Biol* 2011, **11**:162.

4. Tanaka Y, Nose T, Jikumaru Y, Kamiya Y: **ABA inhibits entry into stomatal-lineage development in Arabidopsis leaves.** *Plant J* 2013, **74**:448–457.

5. Niwa T, Kondo T, Nishizawa M, Kajita R, Kakimoto T, Ishiguro S: **EPIDERMAL PATTERNING FACTOR LIKE5 peptide represses stomatal development by inhibiting meristemoid maintenance in Arabidopsis thaliana.** *Biosci Biotechnol Biochem* 2013, **77**:1287–1295.

6. Pillitteri LJ, Peterson KM, Horst RJ, Torii KU: **Molecular profiling of stomatal meristemoids reveals new component of asymmetric cell division and commonalities among stem cell populations in Arabidopsis.** *Plant Cell* 2011, **23**:3260–3275.
